# Supplementary material
Source: publisher figshare collection journal article supplement (https://sage.figshare.com/ndownloader/files/14427632)
Supplement: Supplementary file 1 [file 14427632]

## Supplemental Material

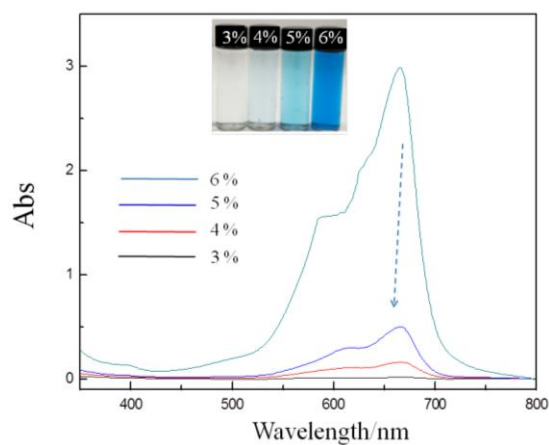

Fig.S1 UV-Vis spectra and images of the supernatants after adsorption by SEP with an mMB/mSEP of 3 %-6 %.

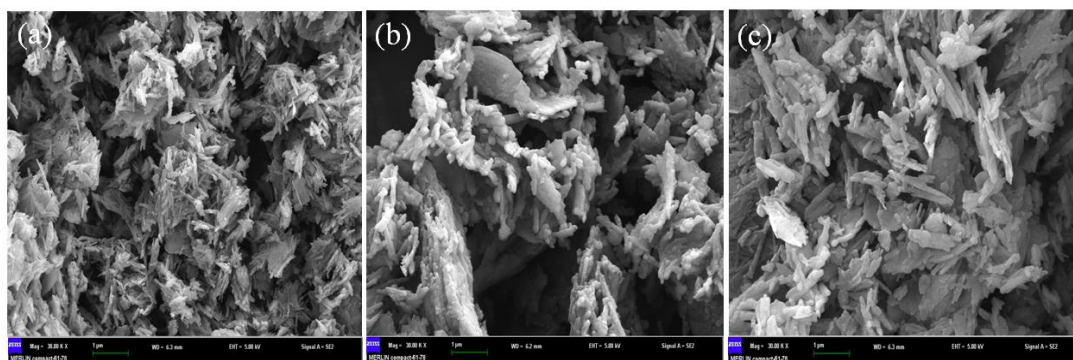

Fig.S2 SEM images of MB@POS/SEP prepared with 0.15 M HDTMS and C<sub>TEOS</sub> of (a) 0, (b) 0.15 and (c) 0.235 M.

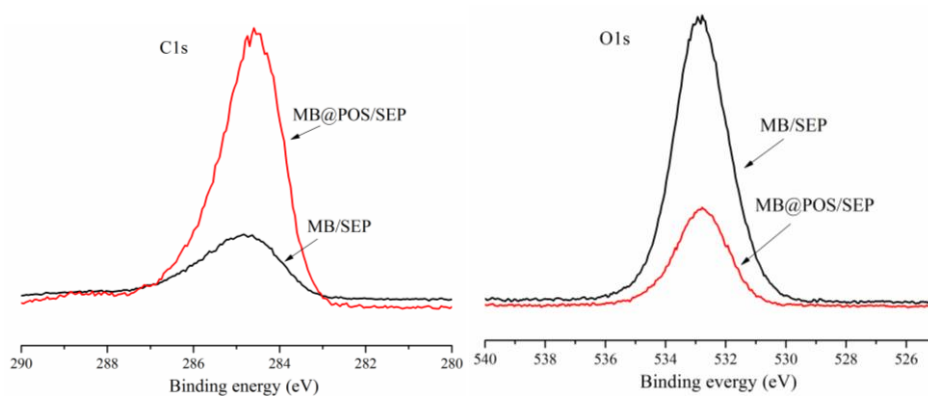

Fig.S3 C1s and O1s XPS spectra of MB/SEP and MB@POS/SEP.

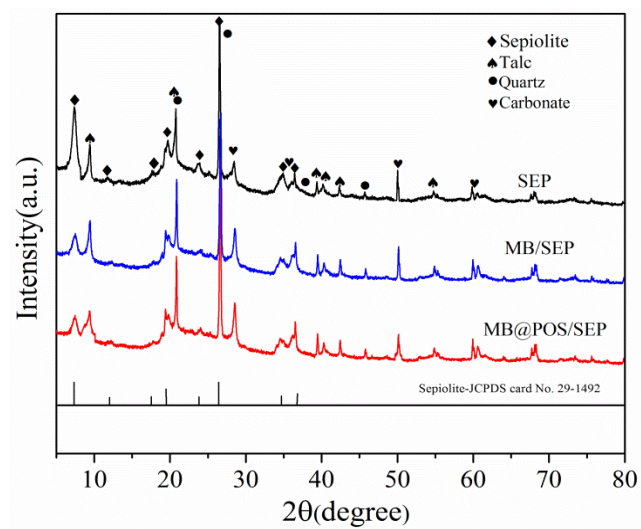

Fig.S4 XRD patterns of SEP, MB/SEP and MB@POS/SEP.  $C_{\text{HDTMS}}=0.15$  M and  $C_{\text{TEOS}}=0.15$  M.

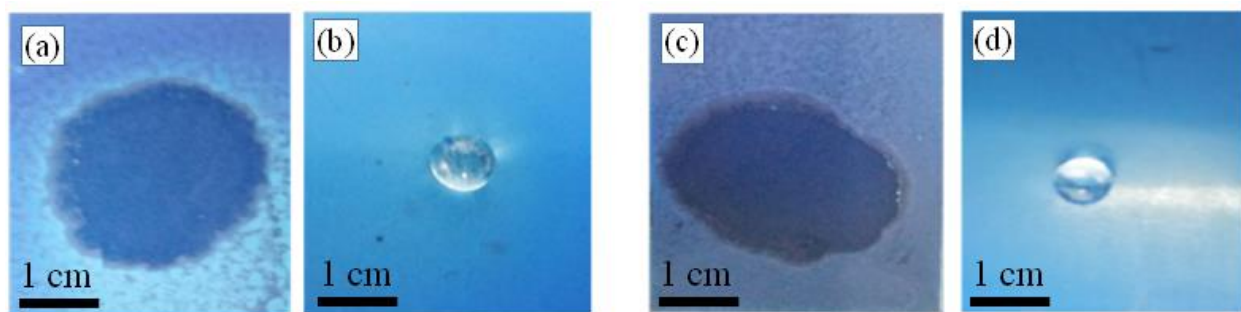

Fig.S5 Images of the MB/SEP (a, c) and MB@POS/SEP (b, d) coatings after attacks of 0.1 M HCl, 0.1 M NaOH.

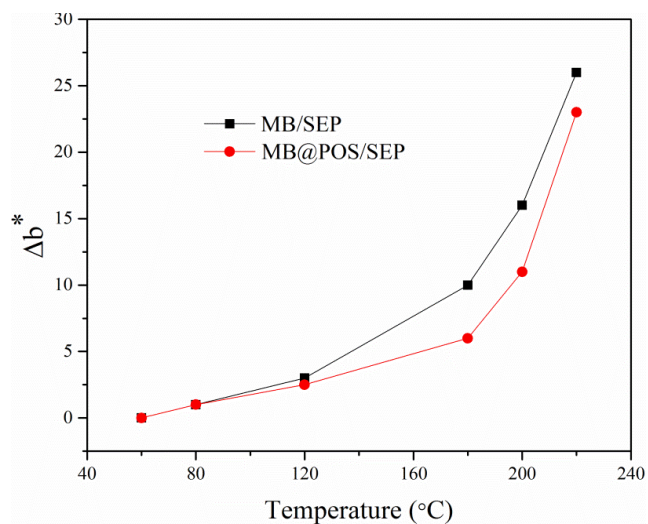

Fig.S6 Effect of calcination temperature on the color change ( $\Delta b^*$ ) (relative error  $\pm 3\%$ ).

Table.S1 The BET data and Zeta potentials of MB, SEP, MB/SEP and MB@POS/SEP.

| Samples    | Surface area | Pore volume (cm <sup>3</sup> /g) | Zeta potential (mV) |
|------------|--------------|----------------------------------|---------------------|
| MB         | -            | -                                | 0.6                 |
| SEP        | 165          | 0.42                             | -14.3               |
| MB/SEP     | 80           | 0.31                             | -13.5               |
| MB@POS/SEP | 28           | 0.11                             | -                   |
